1 **A phased, chromosome-scale genome of ‘Honeycrisp’ apple (*Malus domestica*)**

2

3 Awais Khan<sup>1</sup>□, Sarah B. Carey<sup>2,3</sup>, Alicia Serrano<sup>1</sup>, Huiting Zhang<sup>4,5</sup>, Heidi Hargarten<sup>4</sup>, Haley  
4 Hale<sup>2,3</sup>, Alex Harkess<sup>2,3</sup>, Loren Honaas<sup>4</sup>□

5

6 <sup>1</sup>Plant Pathology and Plant-Microbe Biology Section, Cornell University, Geneva, NY, 14456,  
7 USA

8 <sup>2</sup>Department of Crop, Soil, and Environmental Sciences, Auburn University, Auburn, AL,  
9 36849, USA

10 <sup>3</sup>HudsonAlpha Institute for Biotechnology, Huntsville AL, 35806, USA

11 <sup>4</sup>USDA ARS Tree Fruit Research Lab, Wenatchee, WA 98801, USA

12 <sup>5</sup>Department of Horticulture, Washington State University, Pullman, WA USA

13

14 □ corresponding author(s) = [awais.khan@cornell.edu](mailto:awais.khan@cornell.edu); [loren.honaas@usda.gov](mailto:loren.honaas@usda.gov)

15 **Abstract**

16 ‘Honeycrisp’ is one of the most valuable apple cultivars grown in the United States and a popular  
17 breeding parent due to its superior fruit quality traits, high levels of cold hardiness, and disease  
18 resistance. However, it suffers from a number of physiological disorders and is susceptible to  
19 production and postharvest issues. Although several apple genomes have been sequenced in the  
20 last decade, there is still a substantial knowledge gap in understanding the genetic mechanisms  
21 underlying cultivar-specific traits. Here we present a fully phased, chromosome-level genome of  
22 ‘Honeycrisp’ apples, using PacBio HiFi, Omni-C, and Illumina sequencing platforms. Our  
23 genome assembly is by far the most contiguous among all the apple genomes. The sizes of the  
24 two assembled haplomes are 674 Mb and 660 Mb, with contig N50s of 32.8 Mb and 31.6 Mb,  
25 respectively. In total, 47,563 and 48,655 protein coding genes were annotated from each  
26 haplome, capturing 96.8-97.4% complete BUSCOs in the eudicot database, the most complete  
27 among all *Malus* annotations. A gene family analysis using seven *Malus* genomes shows that a  
28 vast majority of ‘Honeycrisp’ genes are assigned into orthogroups shared with other genomes,  
29 but it also reveals 121 ‘Honeycrisp’-specific orthogroups. We provide a valuable resource for  
30 understanding the genetic basis of horticulturally important traits in apples and other related tree  
31 fruit species, including at-harvest and postharvest fruit quality, abiotic stress tolerance, and  
32 disease resistance, all of which can enhance breeding efforts in Rosaceae.

## 33 **Main Content**

### 34 **Background**

35 Apples are the most consumed fruit in the United States ([www.ers.usda.gov](http://www.ers.usda.gov)). The annual  
36 estimated total value of the US apple industry is \$21 billion, with five cultivars alone accounting  
37 for 2/3 of production (in order of proportion): ‘Gala’, ‘Red Delicious’, ‘Honeycrisp’, ‘Granny  
38 Smith’, and ‘Fuji’ ([www.usapple.org](http://www.usapple.org)). Of these, ‘Honeycrisp’ is by far the most valuable - it has  
39 roughly twice the value per pound of the next most valuable cultivar, ‘Fuji’ [1]. ‘Honeycrisp’ is  
40 appreciated by consumers, and therefore by the US apple industry, for its superior flavor and  
41 crisp juicy texture. Importantly, properly stored ‘Honeycrisp’ fruit is well-preserved for several  
42 months [2,3]. Additionally, this cultivar shows high levels of cold hardiness [4] and resistance to  
43 apple scab, the most economically important fungal disease of apples worldwide [5].  
44 ‘Honeycrisp’ was bred at the University of Minnesota in the 1960s aiming to obtain cold hardy  
45 cultivars with high-quality fruit; it was released in 1991 [6] (Figure 1A). Recent genome-wide  
46 analysis (following the resolution of the ‘Honeycrisp’ pedigree [7,8]) showed that the genetic  
47 background of ‘Honeycrisp’ is distinct from other important apple cultivars in the US. This is  
48 highlighted by the success of ‘Honeycrisp’ as a source of interesting genetic diversity in apple  
49 breeding programs worldwide to enhance texture, storability, and improved disease resistance  
50 [3,5,7,9,10]. In fact, nine new cultivars derived from ‘Honeycrisp’ are already on the market.

51 Disease resistance, critical for sustainable apple production, has historically been less  
52 important due to a market dominated by modern cultivars bred primarily for fruit quality and  
53 intensive conventional production systems [11]. Most apple cultivars grown commercially in the  
54 US are susceptible to fungal diseases such as apple scab. In temperate and humid regions around  
55 the world, frequent applications of fungicides are necessary, contributing significantly to  
56 production costs, and to negative human health and environmental impacts [12]. ‘Honeycrisp’ is  
57 resistant to apple scab and importantly, this cultivar’s ability to retain crispness and firmness  
58 during storage is one of the most outstanding traits of ‘Honeycrisp’ fruit [13]. However, there are  
59 other production issues with ‘Honeycrisp’ that present challenges for apple growers (Figure 1E-  
60 G). ‘Honeycrisp’ needs a carefully designed nutrient management program during the growing  
61 season for optimal production and fruit quality, especially to limit the occurrence of the  
62 physiological disorder bitter pit [3]. ‘Honeycrisp’ trees also have greater tendency to develop  
63 zonal leaf chlorosis, a physiological disorder that reduces photosynthetic capacity [14]. However,

64 in the Pacific Northwest (PNW), where a large majority of the ‘Honeycrisp’ apples are grown in  
65 the US ([www.nwhort.org](http://www.nwhort.org)) due in part to low disease pressure, postharvest issues during long-  
66 term storage pose substantial challenges to producers.

67 The total cullage of ‘Honeycrisp’ fruit is likely among the highest of apple cultivars due  
68 to its susceptibility to various postharvest physiological disorders, which have complex  
69 etiologies that are poorly understood, and include bitter pit, soft scald, soggy breakdown, and  
70 CO<sub>2</sub> injury [15–18]. Postharvest technologies have been developed and deployed to mitigate  
71 these disorders [19–21]. However, the efficacy of postharvest treatments can be affected by  
72 many factors such as pre-harvest orchard management and at-harvest fruit maturity, a key factor  
73 in the maintenance of postharvest apple fruit quality. Growers must balance the acquisition of  
74 certain fruit quality characteristics (*e.g.* size, color, flesh texture, and sugar content), while  
75 attempting to minimize risk for maturity-linked losses in quality that may occur in the supply  
76 chain [22]. This balancing act for maximizing at-harvest fruit quality and long-term cold storage  
77 potential in controlled atmospheres is especially difficult for ‘Honeycrisp’.

78 To maximize both our understanding of genetic mechanisms driving important  
79 ‘Honeycrisp’ traits and to assist tree fruit breeders, high quality genomes are required [23].  
80 Indeed, in the last decade since ‘Golden Delicious’ was sequenced [24], a large number of genes  
81 and QTLs linked to fruit disease resistance, quality traits, and abiotic stress tolerance in apples  
82 have been identified [5,25,26]. Recent high-quality genomes of ‘Gala’, the double haploid  
83 ‘Golden Delicious’, and the triploid ‘Hanfu’ provide genomic resources for apple genetics and  
84 breeding [27–29]. These studies have identified targeted genomic regions for the development of  
85 diagnostic molecular markers to breed disease resistant apple cultivars with good fruit quality  
86 [30]. However, the fact remains that traditional apple breeding is a resource-intensive and time-  
87 consuming process [9,26,30] and there are still substantial gaps in our knowledge of genetic  
88 mechanisms involved in many important apple traits. In this manuscript we report a phased,  
89 chromosome-level genome assembly of the ‘Honeycrisp’ apple cultivar generated from PacBio  
90 HiFi and Dovetail Omni-C, plus a high-quality annotation – thus providing one of the best  
91 genome resources available for apples to date.

92

## 93 **Methods**

94

95 ***PacBio HiFi sequencing:*** Cuttings of dormant wood were collected from ‘Honeycrisp’ trees  
96 growing in the experimental orchard at Cornell AgriTech (Geneva, NY, USA). The cuttings were  
97 placed in water in the greenhouse until leaves began emerging from the buds, and thereafter  
98 placed in the dark for two days. Young, dark-adapted leaves were collected and shipped on dry  
99 ice to the DNA Sequencing and Genotyping Center at the University of Delaware (DL, USA) for  
100 DNA extraction and Single Molecule Real Time (SMRT) PacBio (Pacific BioSciences)  
101 sequencing.

102 High-molecular-weight (HMW) genomic DNA was extracted using a DNeasy Plant Mini  
103 Kit (Qiagen) according to the manufacturer's protocol. HMW genomic DNA was sheared to 15  
104 kb fragments, and the HiFi library was prepared using SMRTbell Express Template Prep Kit 2.0  
105 and the DNA/Polymerase Binding Kit 2.0 (Pacific Biosciences) according to the manufacturer’s  
106 protocol. The sequencing library was size-selected using Sage Blue Pippin (Sage Sciences) to  
107 select fragment sizes of >10 kb to ensure removal of smaller fragments and adapter dimers. The  
108 library was sequenced on a PacBio Sequel II instrument in CCS/HiFi mode with two SMRT cells  
109 with 2 hours pre-extension and 30-hour movie times. Read length distribution and quality of all  
110 HiFi reads was assessed using Pauvre v0.1923 (<https://github.com/conchoecia/pauvre>).

111 To scaffold the genome using chromatin conformation sequencing, 1 g of flash-frozen  
112 young leaf material was harvested from ‘Honeycrisp’ trees at the Washington State University  
113 Sunrise Research Orchard near Rock Island, WA USA and shipped to the HudsonAlpha Institute  
114 for Biotechnology in Huntsville, AL USA. The sequencing library was prepared using the  
115 Dovetail Genomics Omni-C kit and was sequenced on an Illumina NovaSeq 6000 with PE150  
116 reads. A subset of 1 million read pairs were used as input for Phase Genomics *hic\_qc* to validate  
117 the overall quality of the library ([https://github.com/phasegenomics/hic\\_qc](https://github.com/phasegenomics/hic_qc)).

118  
119 ***Phased haplome assembly and scaffolding:*** The expected genome size, heterozygosity, and  
120 percent of repeats was assessed by generating 21-mer sequences from the raw HiFi data with  
121 Jellyfish v2.3.0 [31] and GenomeScope2 [32,33]. HiFi reads were assembled into contigs using  
122 hifiasm v0.16.1 [34,35], with the Hi-C integration mode that incorporated Dovetail Omni-C  
123 reads for phasing. Both haplomes of the assembly were scaffolded into chromosomes using the  
124 Juicer pipeline v1.6 [36], where the Omni-C reads were mapped separately to both hifiasm  
125 haplomes [35,37] with the parameter “-s none”. The Omni-C data was subset to ~100x coverage

126 and the 3D-DNA v201008 scaffolding pipeline [38] was run with options “--editor-saturation-  
127 centile 10 --editor-coarse-resolution 100000 --editor-coarse-region 400000 --editor-repeat-  
128 coverage 50”. Contact maps were manually edited using the Juicebox Assembly Tools (JBAT)  
129 v1.11.08 [36] to produce the expected 17 chromosomes per haplome. Contigs that contained  
130 assembled telomeres were correctly oriented to the terminal ends by searching for the  
131 TTTAGGG repeat (or the reverse complement CCCTAAA) using the analyze\_genome function  
132 of GENESPACE [39]. The chromosomes were numbered and oriented using haplome A of the  
133 ‘Gala’ assembly [27]. Genome quality and completeness was assessed using benchmarking  
134 universal single-copy gene orthologs (BUSCO v5.2.2) [40] with the “eudicots\_odb10” database.  
135 Haplome completeness was also assessed using Merqury v1.3 [41].

136  
137 **Transcriptome sequencing:** To facilitate gene annotation, total RNA was isolated from various  
138 tissues harvested from ‘Honeycrisp’, ‘Red Delicious’, and ‘Granny Smith’ apple trees grown at  
139 the Washington State University (WSU) Sunrise Research Orchard near Rock Island, WA USA,  
140 ‘Gala’ and ‘WA38’ apple trees grown at the WSU and USDA-ARS Columbia View Research  
141 Orchard near Orondo, WA USA, and ‘D’Anjou’ pear trees grown at the WSU Tree Fruit  
142 Research and Extension Center Research Orchard in Wenatchee, WA USA using a modified  
143 CTAB/Chloroform extraction [42]. Total RNA was assessed for quality (RNA integrity number  
144 (RIN)  $\geq 8$ ) and purity (A260/280  $> 1.8$ ). Sources for all RNA are available in Table 3. 2  $\mu\text{g}$  of  
145 total RNA was used to construct Illumina TruSeq stranded libraries following manufacturers’  
146 instructions. Libraries were sequenced on an Illumina NovaSeq 6000 with PE150 reads at the  
147 HudsonAlpha Institute for Biotechnology in Huntsville, AL USA.

148  
149 **Repeat analysis and gene annotation:** Repetitive elements on both haplotypes were annotated  
150 using EDTA v2.0.0 [43] with flags “--genome, --anno 1, --sensitive=1”. To supplement *ab initio*  
151 gene predictions, extensive extrinsic gene annotation homology evidence is needed. Thus, we  
152 downloaded existing RNA-seq data for ‘Honeycrisp’ apples from NCBI using SRA toolkit  
153 v2.9.6-1 (SRX3408575, SRX5369275, SRX5369276, SRX5369290, SRX5369299,  
154 SRX5369300, SRX5369302, SRX8712695 and SRX8712718) [44–46], and combined with the  
155 RNA-seq data generated for this project (described above). We *de novo* assembled these two sets  
156 of RNA transcripts separately using Trinity v2.13.2 [47], where we used the flag --trimmomatic

157 to filter the reads for quality. Because the newly generated RNA-seq data were strand-specific,  
158 for these we also used the flag “--SS\_lib\_type RF”. We identified open reading frames using  
159 TransDecoder v5.5.0 [48]. Gene annotation was performed using BRAKER2 v2.1.6 [49], where  
160 we ran BRAKER2 twice, with RNA-seq data and protein databases run separately. For the RNA-  
161 seq run, we first filtered the data for adapters and quality using TRIMMOMATIC v0.39 [50]  
162 with leading and trailing values of 3, sliding window of 30, jump of 10, and a minimum  
163 remaining read length of 40. We next mapped these data to the genome using STAR v2.7.9a [51]  
164 and combined the BAM files using SAMtools [52]. For the homology-based annotation in  
165 BRAKER2, we used gene models from *Malus domestica* ‘Gala’ diploid v2, *M. sieversii* diploid  
166 v2 [27], *M. baccata* v1 [53], *M. domestica* ‘Golden Delicious’ double haploid v1 (GDDH13)  
167 [29], *Pyrus communis* ‘Barlett’ double haploid v2 [54], and our *de novo* assemblies, in addition  
168 to the viridiplantae OrthoDB [55]. We filtered the resulting AUGUSTUS [49] output for those  
169 that contained full hints (gene model support) and combined the two runs using TSEBRA v1.0.3  
170 [56]. Finally, we removed any transcript/gene that had  $\geq 90\%$  softmasking, *i.e.*, mainly repeat  
171 sequences. Genome annotation completeness of our genome and other *Malus* genomes were  
172 assessed using BUSCO v5.2.2 [40] with the “eudicots\_odb10” database for comparative  
173 purposes.

174 The final ‘Honeycrisp’ gene sets from both haplomes were annotated with InterProScan  
175 v5.44-79.0 [57,58], including a search against all the available interpro databases and Gene  
176 Ontology (GO) [59,60] prediction. In addition, genes were searched against the 26Gv2.0  
177 OrthoFinder v1.1.5 [61] gene family database using both BLASTp [62] and HMMscan [63]  
178 classification methods with the *GeneFamilyClassifier* tool from PlantTribes 2  
179 ([github.com/dePamphilis/PlantTribes/](https://github.com/dePamphilis/PlantTribes/)). This analysis provided additional functional annotation  
180 information that includes gene counts of scaffold taxa, superclusters at multiple clustering  
181 stringencies, and functional annotations that were pulled from various public genomic databases.

182  
183 **Comparative genomics:** Similarities in lengths and structural variations between the two  
184 haplomes were determined by running MUMmer v4.0 [64] and Assemblytics [65]. To identify  
185 the shared and unique gene families among *Malus* species and cultivars, genes from the six  
186 publicly available *Malus* genomes (Table 5) were integrated into the aforementioned PlantTribes  
187 2 gene model database (26Gv2.0) using the same method as described above. The overlapping

188 orthogroups (with at least 30 counts in the category) among the eight *Malus* annotations  
189 (including both haplomes from ‘Honeycrisp’) were calculated and visualized with an upset plot  
190 generated by TBtools v1.0986982 [66].

191

## 192 **Results**

### 193 *A haplotype-phased chromosome-scale assembly*

194 In total, nearly 55X coverage of PacBio HiFi reads and nearly 200X coverage of Dovetail  
195 Omni-C reads (Table 1) was generated. This included 2,543,518 HiFi reads with an average  
196 length of 14,655 bp and ~91% of reads  $\geq 10,000$  bp. Two phased haplomes, haplome A (HAP1)  
197 and haplome B (HAP2, these two sets of terms will be used interchangeably in this manuscript),  
198 were assembled and validated by inspection of the Omni-C contact maps (Figure 2). Both  
199 haplomes are highly contiguous and of similar size. HAP1 is 674 Mb in length, contained in 473  
200 contigs with a contig  $N_{50}$  of 32.8 Mb, whereas HAP2 is 660 Mb in length, contained in 215  
201 contigs with a contig  $N_{50}$  of 31.6 Mb (Table 2). Zero miss-joins requiring manual breaks were  
202 identified in the assemblies. For HAP1, a total of 13 joins were made to build the final assembly  
203 into 17 chromosomes, with 95.4% of the assembled sequence contained in the 17  
204 pseudomolecules representing chromosomes. A total of 19 joins were made for HAP2, with  
205 98.2% of the assembled sequence in the 17 pseudomolecules. Based on the Merqury k-mer  
206 analysis (Figure 3), the HAP1 assembly had a k-mer completeness of 82.7% (Quality value (QV)  
207 64.5), the HAP2 assembly 83% (QV 66.7), and the combined assemblies were 98.6% (QV 65.5)  
208 (Table 2). BUSCO completeness of HAP1 was 98.6% and HAP2 98.7%, suggesting high  
209 genome completeness for both haplomes, comparable or superior to other high quality apple  
210 genome assemblies (Table 5). The two haplomes are structurally similar to each other (Figure 4).  
211 Compared to the assembly statistics of previously published apple genomes, the current  
212 ‘Honeycrisp’ assemblies are the most contiguous to date (Table 5).

213

### 214 *Genome annotation*

215 The yield of Illumina transcriptome sequencing data of fruit, leaves, and flower tissues of  
216 apples and pear ranged from approximately 9 to 27 gigabases (Gb) in flowers and leaf buds  
217 respectively (Table 3). Nearly 62% of both haplomes were annotated as repetitive DNA, mostly  
218 comprised of Long Terminal Repeat (LTR) retrotransposons (Table 4). A total of 47,563 genes



219 were annotated in HAP1 and 48,655 in HAP2, slightly more than in other published *Malus*  
220 annotations (Table 5). Complete BUSCO scores of the protein annotations are 96.8% for HAP1  
221 and 97.4% for HAP2, the highest completeness among all publicly available *Malus* genome  
222 annotations (Table 5). 72.85% and 68.88% of the predicted transcripts were annotated with  
223 Interpro terms, 68.58% and 64.94% with Pfam domains, and 51.04% and 48.76% with at least  
224 one GO terms in HAP1 and HAP2, respectively. In the PlantTribes 2 classification, 91.11% and  
225 85.50% of the predicted transcripts from HAP1 and HAP2, respectively, were assigned to pre-  
226 computed orthogroups.

227 As the number of plant genomes are being generated at an unprecedented speed, we  
228 developed the following gene naming convention to avoid potential ambiguity.  
229 Maldo.hc.v1a1.ch10A.g00001.t1: Maldo for *Malus domestica*; hc for the cultivar, ‘Honeycrisp’;  
230 v1a1 indicating this is the first assembly and first annotation of this genome; ch10A identifies  
231 that the gene is annotated from chromosome 10 (versus from an unplaced scaffold, which will be  
232 indicated by “sc”) in haplome A (HAP1) (versus haplome B (HAP2)); g00001 is a five digit gene  
233 identifier; t1 represents a transcript number of the gene.

234

### 235 ***Gene family analysis***

236 A gene family evaluation was performed using PlantTribes 2 and its 26Gv2-scaffold  
237 orthogroup database, which contains representative protein coding sequences from most major  
238 land plant lineages. A total of 11,263 unique orthogroups (OGs) were identified in all eight  
239 *Malus* annotations (including the two ‘Honeycrisp’ haplomes) investigated. ‘Honeycrisp’  
240 transcripts were assigned to 10,351 and 10,367 orthogroups, similar to ‘Gala’ and GDDH13  
241 (Table 5 and Figure 5). We further investigated orthogroups that are shared and unique in the  
242 eight *Malus* annotations. A vast majority (7,645) of orthogroups are shared by all the genomes,  
243 and a total of 9,279 orthogroups were shared among both ‘Honeycrisp’ haplomes and five other  
244 genomes (Figure 5). This comparison indicates that the ‘Honeycrisp’ annotation captured genes  
245 in virtually all the *Malus* gene families. In addition, we also found 54 orthogroups that are unique  
246 to ‘Honeycrisp’ (*i.e.*, shared by the two ‘Honeycrisp’ haplomes only) and 35 and 32 that are  
247 unique to each ‘Honeycrisp’ haplome (Figure 5). These orthogroups could provide valuable  
248 information in the molecular mechanisms underlying genotype-specific traits.

249

250 **Re-use Potential**

251 This fully phased, high-quality, chromosome-scale genome of ‘Honeycrisp’ apple will add to the  
252 toolbox for apple genetic research and breeding. It will enable genetic mapping, identification of  
253 genes, and development of molecular markers linked to disease, pest resistance, abiotic stress  
254 tolerance and adaptation, as well as horticulturally relevant harvest and postharvest fruit quality  
255 traits for use in apple breeding programs. Ultimately, the addition of high-quality genomic  
256 resources for ‘Honeycrisp’ can lead to enhanced orchard and supply chain management for many  
257 other apple cultivars, promoting future sustainability of the pome fruit industry.

258

259 **Data Availability**

260 The whole genome sequence data generated in this study have been deposited at the National  
261 Center for Biotechnology Information (NCBI) database under BioProject ID PRJNA791346.  
262 PacBio HiFi reads, and Hi-C reads are deposited in NCBI with the SRA accession number  
263 SAMN24287034 and SAMN29611953, respectively. Transcriptomic data generated in this study  
264 for genome annotation are deposited in NCBI with SRA accession number from  
265 SAMN29611954 to SAMN29611992. The Maldo.hc.v1a1 ‘Honeycrisp’ genome assembly, gene  
266 annotation, and functional annotation for both haplotypes can be accessed *via* the Genomic  
267 Database for Rosaceae (in progress) and the GigaScience GigaDB repository.

268

269 **Declarations**

270 **List of abbreviations**

271 BLAST: Basic Local Alignment Search Tool; bp: Base Pair; BUSCO: Benchmarking Universal  
272 Single Copy Orthologs; Gb: gigabases; GO: Gene Ontology; HMW: High-molecular-weight;  
273 JBAT: Juicebox Assembly Tools; LTR: Long Terminal Repeat; NCBI: National Centre for  
274 Biotechnology Information; OG: Orthogroup; QV: Quality Value; RIN: RNA Integrity Number;  
275 SMRT: Single Molecule Real Time; TRF: Tandem Repeat Finder

276

277 **Competing interests**

278 The authors declare that they have no competing interests.

279

280 **Funding**

281 This research was funded by Washington Tree Fruit Research Commission AP-19-103, United  
282 States Department of Agriculture, Agricultural Research Service and New York State's Apple  
283 Research and Development Program (ARDP).

284

### 285 **Author Contribution**

286 A.K., and L.H. conceptualized, designed, and managed the project. S.B.C., H.Z., A.H., and H.H,  
287 constructed DNA and RNA, and RNA-seq libraries for sequencing. S.B.C., and H.Z., performed  
288 genome and transcriptome sequence analysis and interpretation. S.B.C., H.Z., A.S., H.H., A.H.,  
289 L.H., and A.K. drafted, revised, and finalized the manuscript. All authors read and approved the  
290 manuscript.

291

### 292 **Acknowledgements**

293 We acknowledge the help of Della Cobb-Smith and Jugpreet Singh for sample collection and  
294 preparation for genomic DNA extraction.

295 **Figures and Tables**

296

297 **Figure 1:** ‘Honeycrisp’ is a highly desirable apple cultivar, appreciated by consumers for its  
298 superior flavor, texture, and visual appeal (A). To fulfill high-market demand for ‘Honeycrisp’,  
299 growers need to optimize production traits, and address several diseases and physiological  
300 disorders of concern to ensure high levels of production and fruit quality, including zonal leaf  
301 chlorosis (B), fungal diseases like the bitter rot pathogen complex (*Colletotrichum*  
302 *gloeosporioides* and *C. acutatum*) (C) the black rot pathogen (*Botryosphaeria obtuse*) (D), as well  
303 as postharvest storage disorders like bitter pit (E) soft scald (F), and soggy breakdown (G).

304

305 **Figure 2:** Omni-C contact maps of the assembled chromosome-length scaffolds of 17  
306 chromosomes of (A) Haplome A and (B) Haplome B, from the ‘Honeycrisp’ genome.

307

308 **Figure 3:** Histogram of k-mer multiplicity of sequence reads for (A) Haplome A and, (B)  
309 Haplome B of ‘Honeycrisp’ genome assemblies. K-mer multiplicity (x-axis) is plotted against k-  
310 mer counts (y-axis) to estimate the heterozygosity, copy numbers, sequencing depth, and  
311 completeness of a genome using Merquy v1.3 [41]. Colors in the plot represent the number of  
312 times each k-mer is found in the genome assembly.

313

314 **Figure 4:** Synteny comparison of ‘Honeycrisp’ Haplome 1 (HAP1), ‘Honeycrisp’ Haplome 2  
315 (HAP2) from this study, and ‘Gala’ [27] genomes. GENESPACE [39] was used for synteny  
316 comparison.

317

318 **Figure 5:** The Honeycrisp genome captured a vast majority of *Malus* gene families. Black dots  
319 indicate presence of gene families and gray dots indicate absence. Yellow horizontal bars  
320 represent the number of orthogroups in each genome. The black vertical bars represent the  
321 number of orthogroups in each category. Genome abbreviations - HC: ‘Honeycrisp’ (this work);  
322 GDDH13: *Malus domestica* GDDH13; Gala\_hap: *M. domestica* ‘Gala’ haploid; M.si\_hap: *M.*  
323 *sieversii* haploid; M.sy\_hap: *M. sylvestris* haploid; HFTH: *M. domestica* HFTH1; GDv1: *M.*  
324 *domestica* Golden Delicious v1.

325 **Table 1:** Overview of PacBio HiFi and Omni-C sequencing data generated for the ‘Honeycrisp’  
326 genome assembly.

| Library | Sequencing  | Length (Nucleotides) | Number of reads |
|---------|-------------|----------------------|-----------------|
| JNQN    | Omni-C      | 150                  | 951,241,272     |
| HiFi-1  | PacBio HiFi | 14,881*              | 1,088,992       |
| HiFi-2  | PacBio HiFi | 14,429*              | 1,454,526       |

327 \*Average length

328

329 **Table 2:** Summary of ‘Honeycrisp’ genome assembly statistics.

| Assembly             | Length      | # Contigs | Longest contig | N50        | L50 | QV   | k-mer completeness (%) | BUSCO (%) |
|----------------------|-------------|-----------|----------------|------------|-----|------|------------------------|-----------|
| Honeycrisp Haplome A | 674,476,353 | 473       | 55,653,390     | 32,818,622 | 9   | 64.5 | 82.7                   | 98.6      |
| Honeycrisp Haplome B | 660,238,068 | 215       | 56,154,892     | 31,578,807 | 9   | 66.7 | 83                     | 98.7      |
| Combined             |             |           |                |            |     | 65.5 | 98.6                   |           |

330 **Table 3:** Yield of Illumina transcriptome sequencing of fruit, leaves, and flower tissues of apples and pear generated and used for  
 331 genome annotation in this study.

| Cultivar      | Tissue                     | Reads      | Yield (Gb)     | Yield P20 (Gb) | Ave Read length | NCBI SRA     |
|---------------|----------------------------|------------|----------------|----------------|-----------------|--------------|
| Honeycrisp    | Fruitlet stage 1           | 45,773,784 | 13,823,682,768 | 13,069,822,280 | 142             | SAMN29611971 |
|               | Fruitlet stage 2           | 35,618,706 | 10,756,849,212 | 10,227,275,771 | 143             | SAMN29611972 |
|               | Budding leaves             | 81,448,971 | 24,597,589,242 | 22,769,634,770 | 139             | SAMN29611973 |
|               | Expanding leaves           | 35,381,039 | 10,685,073,778 | 9,971,308,535  | 141             | SAMN29611974 |
|               | Half-inch terminal buds    | 47,811,924 | 14,439,201,048 | 13,409,542,519 | 140             | SAMN29611975 |
|               | Flower buds                | 45,822,773 | 13,838,477,446 | 13,175,876,315 | 144             | SAMN29611976 |
|               | Open flowers               | 30,938,395 | 9,343,395,290  | 8,718,474,885  | 141             | SAMN29611977 |
| Gala          | Fruitlet stage 1           | 80,440,219 | 24,292,946,138 | 22,928,129,883 | 142             | SAMN29611954 |
|               | Fruitlet stage 2           | 32,475,136 | 9,807,491,072  | 9,284,944,973  | 143             | SAMN29611955 |
|               | Budding leaves             | 30,368,057 | 9,171,153,214  | 8,508,033,713  | 140             | SAMN29611956 |
|               | Expanding leaves           | 40,650,277 | 12,276,383,654 | 11,306,267,120 | 138             | SAMN29611957 |
|               | Roots from tissue culture  | 35,324,786 | 10,668,085,372 | 9,940,132,737  | 140             | SAMN29611958 |
|               | Quarter-inch terminal buds | 37,532,631 | 11,334,854,562 | 10,634,379,784 | 141             | SAMN29611959 |
|               | Flower buds                | 39,636,821 | 11,970,319,942 | 11,141,652,382 | 140             | SAMN29611960 |
|               | Open flowers               | 34,363,075 | 10,377,648,650 | 9,775,838,818  | 142             | SAMN29611961 |
| Red Delicious | Fruitlet stage 2           | 27,319,955 | 8,250,626,410  | 7,682,200,349  | 140             | SAMN29611962 |
| Granny Smith  | Fruitlet stage 1           | 29,426,606 | 8,886,835,012  | 8,335,731,187  | 141             | SAMN29611963 |
|               | Fruitlet stage 2           | 72,205,133 | 21,805,950,166 | 20,663,261,900 | 143             | SAMN29611964 |
|               | Budding leaves             | 57,244,195 | 17,287,746,890 | 16,179,280,911 | 141             | SAMN29611965 |
|               | Expanding leaves           | 40,798,422 | 12,321,123,444 | 11,499,303,808 | 140             | SAMN29611966 |
|               | Roots from tissue culture  | 32,493,822 | 9,813,134,244  | 9,207,784,729  | 141             | SAMN29611967 |
|               | Quarter-inch terminal buds | 30,394,263 | 9,179,067,426  | 8,512,945,196  | 140             | SAMN29611968 |
|               | Flower buds                | 29,735,514 | 8,980,125,228  | 8,364,532,017  | 140             | SAMN29611969 |
|               | Open flowers               | 34,303,317 | 10,359,601,734 | 9,603,420,430  | 140             | SAMN29611970 |
| WA 38         | Fruitlet stage 1           | 45,284,208 | 13,675,830,816 | 12,831,991,620 | 141             | SAMN29611978 |

|         |                            |            |                |                |     |              |
|---------|----------------------------|------------|----------------|----------------|-----|--------------|
|         | Fruitlet stage 2           | 25,486,256 | 7,696,849,312  | 7,261,195,330  | 142 | SAMN29611979 |
|         | Budding leaves             | 39,339,589 | 11,880,555,878 | 11,017,185,994 | 140 | SAMN29611980 |
|         | Expanding leaves           | 34,784,980 | 10,505,063,960 | 9,719,694,010  | 139 | SAMN29611981 |
|         | Roots from tissue culture  | 33,935,508 | 10,248,523,416 | 9,426,506,860  | 138 | SAMN29611982 |
|         | Quarter-inch terminal buds | 88,677,165 | 26,780,503,830 | 24,913,194,030 | 140 | SAMN29611983 |
|         | Flower buds                | 23,170,354 | 6,997,446,908  | 6,588,921,074  | 142 | SAMN29611984 |
|         | Open flowers               | 35,274,250 | 10,652,823,500 | 9,941,466,644  | 141 | SAMN29611985 |
| d'Anjou | Fruitlet stage 1           | 89,462,306 | 27,017,616,412 | 25,459,693,894 | 142 | SAMN29611986 |
|         | Fruitlet stage 2           | 48,481,031 | 14,641,271,362 | 13,921,844,851 | 143 | SAMN29611987 |
|         | Budding leaves             | 29,823,484 | 9,006,692,168  | 8,442,259,663  | 141 | SAMN29611988 |
|         | Expanding leaves           | 57,920,009 | 17,491,842,718 | 16,460,531,509 | 142 | SAMN29611989 |
|         | Quarter-inch terminal buds | 40,966,825 | 12,371,981,150 | 11,476,090,088 | 140 | SAMN29611990 |
|         | Flower buds                | 29,183,231 | 8,813,335,762  | 8,264,473,671  | 141 | SAMN29611991 |
|         | Open flowers               | 32,128,369 | 9,702,767,438  | 8,996,878,963  | 140 | SAMN29611992 |

332 **Table 4:** Summary of repetitive element annotation in Haplome A and Haplome B of the  
 333 ‘Honeycrisp’ genome assemblies.

| Class         |               | Haplome A     | Haplome B     |
|---------------|---------------|---------------|---------------|
| LTR           |               |               |               |
|               | Copia         | 9.73%         | 9.60%         |
|               | Ty3           | 20.29%        | 17.80%        |
|               | unknown       | 14.89%        | 16.86%        |
| TIR           |               |               |               |
|               | CACTA         | 2.21%         | 1.95%         |
|               | Mutator       | 4.16%         | 4.25%         |
|               | PIF Harbinger | 2.43%         | 2.60%         |
|               | Tc1_Mariner   | 0.15%         | 0.27%         |
|               | hAT           | 2.30%         | 2.31%         |
|               | polinton      | --            | 0.01%         |
| nonLTR        |               |               |               |
|               | LINE_element  | 0.18%         | 0.17%         |
|               | unknown       | 0.09%         | 0.18%         |
| nonTIR        |               |               |               |
|               | helitron      | 2.95%         | 3.18%         |
| repeat region |               | 2.91%         | 2.78%         |
| <b>Total</b>  |               | <b>62.43%</b> | <b>61.97%</b> |

334

335 **Table 5:** Comparison of genomic features and assembly statistics of current assembly of  
 336 ‘Honeycrisp’ genome and previously published genomes of apples.

| Genomes                  | ‘Honeycrisp’ | ‘Gala’,<br><i>M. sieversii</i> ,<br><i>M. sylvestris</i><br>(all Diploid) | HFTH1;<br>‘Hanfu’<br>(Triploid) | GDDH13;<br>‘Golden Delicious’<br>(Double haploid) | ‘Golden<br>Delicious’<br>(Diploid)  |
|--------------------------|--------------|---------------------------------------------------------------------------|---------------------------------|---------------------------------------------------|-------------------------------------|
| Reference                | This work    | <a href="#">Sun et al. 2021</a>                                           | <a href="#">Zhang et. 2019</a>  | <a href="#">Daccord et al. 2017</a>               | <a href="#">Velasco et al. 2010</a> |
| Assembly                 |              |                                                                           |                                 |                                                   |                                     |
| Haploid genome size (Mb) | 660-674      | 666-679                                                                   | 658.9                           | 651                                               | 742                                 |
| scaffold N50             | 31.6-32.8    | 6.1-21.8                                                                  | 6.99                            | 5.5                                               | 16Kb                                |
| Complete BUSCO           | 98.6-98.7%   | 98.0-98.8%                                                                | 98.6%                           | 98.0%                                             | 82.0%                               |



|                              |               |               |        |        |        |
|------------------------------|---------------|---------------|--------|--------|--------|
| <b>Annotation</b>            |               |               |        |        |        |
| <b>Protein-coding genes</b>  | 47,563-48,655 | 44,691-44,847 | 44,677 | 42,140 | 57,386 |
| <b>Complete BUSCO</b>        | 96.8-97.4%    | 94.6-95.4%    | 93.6%  | 96.1%  | 68%    |
| <b>Gene family</b>           |               |               |        |        |        |
| <b>Number of OG in 26Gv2</b> | 10,351-10,367 | 10,044-10,115 | 9,974  | 10,117 | 8,824  |

338 **References**

- 339 1. WSTFA Annual Crop Summary 2017-18: [https://wstfa.org/wstfa-assets/uploads/2017-18-](https://wstfa.org/wstfa-assets/uploads/2017-18-Annual-Growers-Review.pdf)  
340 [Annual-Growers-Review.pdf](https://wstfa.org/wstfa-assets/uploads/2017-18-Annual-Growers-Review.pdf).
- 341 2. Yan D, Shi J, Ren X, Tao Y, Ma F, Li R, et al.. Insights into the aroma profiles and  
342 characteristic aroma of ‘Honeycrisp’ apple (*Malus × domestica*). *Food Chemistry*. 2020; doi:  
343 10.1016/j.foodchem.2020.127074.
- 344 3. Chang H-Y, Vickers ZM, Tong CBS. The use of a combination of instrumental methods to  
345 assess change in sensory crispness during storage of a “Honeycrisp” apple breeding family.  
346 *Journal of Texture Studies*. 2018; doi: 10.1111/jtxs.12325.
- 347 4. Cline JA, Neilsen D, Brownlee RA, Norton D, Quamme HA. Cold Hardiness of New Apple  
348 Cultivars of Commercial Importance in Canada. *Journal of the American Pomological Society*.  
349 2012.
- 350 5. Clark M, Luby J, Bradeen J, Bus V. Identification of Candidate Genes at Rvi19 and Rvi20,  
351 Two Apple Scab Resistance Loci in the ‘Honeycrisp’ Apple (*Malus x domestica*).
- 352 6. Luby JJ, Bedford DS. Honeycrisp Apple. Minnesota Agricultural Experiment Station; 1992.
- 353 7. Howard NP, van de Weg E, Bedford DS, Peace CP, Vanderzande S, Clark MD, et al..  
354 Elucidation of the ‘Honeycrisp’ pedigree through haplotype analysis with a multi-family  
355 integrated SNP linkage map and a large apple (*Malus×domestica*) pedigree-connected SNP data  
356 set. *Hortic Res*. Nature Publishing Group; 2017; doi: 10.1038/hortres.2017.3.
- 357 8. Cabe PR, Baumgarten A, Onan K, Luby JJ, Bedford DS. Using Microsatellite Analysis to  
358 Verify Breeding Records: A study of ‘Honeycrisp’ and Other Cold-hardy Apple Cultivars.  
359 *HortScience*. American Society for Horticultural Science; 2005; doi:  
360 10.21273/HORTSCI.40.1.15.
- 361 9. Teh SL, Kostick S, Brutcher L, Schonberg B, Barritt B, Evans K. Trends in Fruit Quality  
362 Improvement From 15 Years of Selection in the Apple Breeding Program of Washington State  
363 University. *Frontiers in Plant Science*. 122021.
- 364 10. Migicovsky Z, Gardner KM, Richards C, Thomas Chao C, Schwaninger HR, Fazio G, et al..  
365 Genomic consequences of apple improvement. *Hortic Res*. 2021; doi: 10.1038/s41438-020-  
366 00441-7.
- 367 11. Papp D, Gao L, Thapa R, Olmstead D, Khan A. Field apple scab susceptibility of a diverse  
368 *Malus* germplasm collection identifies potential sources of resistance for apple breeding. *CABI*  
369 *Agriculture and Bioscience*. 2020; doi: 10.1186/s43170-020-00017-4.
- 370 12. Papp D, Singh J, Gadoury D, Khan A. New North American Isolates of *Venturia inaequalis*  
371 Can Overcome Apple Scab Resistance of *Malus floribunda* 821. *Plant Disease*. Scientific  
372 Societies; 2020; doi: 10.1094/PDIS-10-19-2082-RE.

- 373 13. Tong C, Krueger D, Vickers Z, Bedford D, Luby J, El-Shiekh A, et al.. Comparison of  
374 Softening-related Changes during Storage of `Honeycrisp` Apple, Its Parents, and `Delicious`.  
375 *Journal of the American Society for Horticultural Science*. American Society for Horticultural  
376 Science; 1999; doi: 10.21273/JASHS.124.4.407.
- 377 14. Howard NP, Tillman J, Vanderzande S, Luby JJ. Genetics of zonal leaf chlorosis and genetic  
378 linkage to a major gene regulating skin anthocyanin production (MdMYB1) in the apple (*Malus*  
379  $\times$  *domestica*) cultivar Honeycrisp. *PLOS ONE*. Public Library of Science; 2019; doi:  
380 10.1371/journal.pone.0210611.
- 381 15. Brooks C, Harley CP. Soft scald and soggy breakdown of apples. *J Agric Res*; 1934.
- 382 16. Rosenberger D, Schupp J, Iungerman K, Hoying S, Straub D, Cheng L. Honeycrisp:  
383 Promising Profit Maker or Just Another Problem Child? *Fruit Quarterly*; 2001.
- 384 17. Rosenberger D, Cox KD. Preventing bitter rot in apples. *Scaffolds Fruit*; 2016.18. Contreras  
385 C, Alsmairat N, Beaudry R. Prestorage Conditioning and Diphenylamine Improve Resistance to  
386 Controlled-atmosphere-related Injury in `Honeycrisp` Apples. *HortScience*. American Society  
387 for Horticultural Science; 2014; doi: 10.21273/HORTSCI.49.1.76.
- 388 19. DeBrouwer EJ, Sriskantharajah K, El Kayal W, Sullivan JA, Paliyath G, Subramanian J. Pre-  
389 harvest hexanal spray reduces bitter pit and enhances post-harvest quality in `Honeycrisp` apples  
390 (*Malus domestica* Borkh.). *Scientia Horticulturae*. 2020; doi: 10.1016/j.scienta.2020.109610.
- 391 20. Mattheis JP, Rudell DR, Hanrahan I. Impacts of 1-Methylcyclopropene and Controlled  
392 Atmosphere Established during Conditioning on Development of Bitter Pit in `Honeycrisp`  
393 Apples. *HortScience*. American Society for Horticultural Science; 2017; doi:  
394 10.21273/HORTSCI.11368-16.
- 395 21. Watkins CB, Nock JF, Weis SA, Jayanty S, Beaudry RM. Storage temperature,  
396 diphenylamine, and pre-storage delay effects on soft scald, soggy breakdown and bitter pit of  
397 `Honeycrisp` apples. *Postharvest Biology and Technology*. 2004; doi:  
398 10.1016/j.postharvbio.2003.11.003.
- 399 22. Watkins CB, Mattheis JP. "Apple" in Postharvest Physiological Disorders in Fruits and  
400 Vegetables. Edited by Sergio Tonetto de Freitas and Sunil Pareek. Postharvest Physiological  
401 Disorders in Fruits and Vegetables. Boca Raton: *CRC Press*; 2019; doi: 10.1201/b22001.
- 402 23. Varshney RK, Bohra A, Yu J, Graner A, Zhang Q, Sorrells ME. Designing Future Crops:  
403 Genomics-Assisted Breeding Comes of Age. *Trends in Plant Science*. 2021; doi:  
404 10.1016/j.tplants.2021.03.010.
- 405 24. Velasco R, Zharkikh A, Affourtit J, Dhingra A, Cestaro A, Kalyanaraman A, et al.. The  
406 genome of the domesticated apple (*Malus*  $\times$  *domestica* Borkh.). *Nat Genet*. 2010; doi:  
407 10.1038/ng.654.
- 408 25. Honaas LA, Hargarten HL, Ficklin SP, Hadish JA, Wafula E, dePamphilis CW, et al.. Co-  
409 expression networks provide insights into molecular mechanisms of postharvest temperature

- 410 modulation of apple fruit to reduce superficial scald. *Postharvest Biology and Technology*. 2019;  
411 doi: 10.1016/j.postharvbio.2018.09.016.
- 412 26. Khan A, Schuyler SK. Breeding and genetics of disease resistance in temperate fruit trees:  
413 challenges and new opportunities. *Theor Appl Genet*. 2022; doi: 10.1007/s00122-022-04093-0.
- 414 27. Sun X, Jiao C, Schwaninger H, Chao CT, Ma Y, Duan N, et al.. Phased diploid genome  
415 assemblies and pan-genomes provide insights into the genetic history of apple domestication.  
416 *Nat Genet*. Nature Publishing Group; 2020; doi: 10.1038/s41588-020-00723-9.
- 417 28. Zhang L, Hu J, Han X, Li J, Gao Y, Richards CM, et al.. A high-quality apple genome  
418 assembly reveals the association of a retrotransposon and red fruit colour. *Nat Commun*. Nature  
419 Publishing Group; 2019; doi: 10.1038/s41467-019-09518-x.
- 420 29. Daccord N, Celton J-M, Linsmith G, Becker C, Choisine N, Schijlen E, et al.. High-quality de  
421 novo assembly of the apple genome and methylome dynamics of early fruit development. *Nat*  
422 *Genet*. Nature Publishing Group; 2017; doi: 10.1038/ng.3886.
- 423 30. Singh J, Sun M, Cannon SB, Wu J, Khan A. An accumulation of genetic variation and  
424 selection across the disease-related genes during apple domestication. *Tree Genetics & Genomes*.  
425 2021; doi: 10.1007/s11295-021-01510-1.
- 426 31. Marçais G, Kingsford C. A fast, lock-free approach for efficient parallel counting of  
427 occurrences of k-mers. *Bioinformatics*. 2011; doi: 10.1093/bioinformatics/btr011.
- 428 32. Ranallo-Benavidez TR, Jaron KS, Schatz MC. GenomeScope 2.0 and Smudgeplot for  
429 reference-free profiling of polyploid genomes. *Nat Commun*. Nature Publishing Group; 2020;  
430 doi: 10.1038/s41467-020-14998-3.
- 431 33. Vurture GW, Sedlazeck FJ, Nattestad M, Underwood CJ, Fang H, Gurtowski J, et al..  
432 GenomeScope: fast reference-free genome profiling from short reads. *Bioinformatics*. 2017; doi:  
433 10.1093/bioinformatics/btx153.
- 434 34. Cheng H, Jarvis ED, Fedrigo O, Koepfli K-P, Urban L, Gemmell NJ, et al.. Haplotype-  
435 resolved assembly of diploid genomes without parental data. *Nat Biotechnol*. Nature Publishing  
436 Group; 2022; doi: 10.1038/s41587-022-01261-x.
- 437 35. Cheng H, Concepcion GT, Feng X, Zhang H, Li H. Haplotype-resolved de novo assembly  
438 using phased assembly graphs with hifiasm. *Nat Methods*. Nature Publishing Group; 2021; doi:  
439 10.1038/s41592-020-01056-5.
- 440 36. Durand NC, Shamim MS, Machol I, Rao SSP, Huntley MH, Lander ES, et al.. Juicer  
441 Provides a One-Click System for Analyzing Loop-Resolution Hi-C Experiments. *cels*. Elsevier;  
442 2016; doi: 10.1016/j.cels.2016.07.002.
- 443 37. Li X, Kui L, Zhang J, Xie Y, Wang L, Yan Y, et al.. Improved hybrid de novo genome  
444 assembly of domesticated apple (*Malus x domestica*). *GigaScience*. 2016; doi: 10.1186/s13742-  
445 016-0139-0.

- 446 38. Dudchenko O, Batra SS, Omer AD, Nyquist SK, Hoeger M, Durand NC, et al.. De novo  
447 assembly of the *Aedes aegypti* genome using Hi-C yields chromosome-length scaffolds. *Science*.  
448 American Association for the Advancement of Science; 2017; doi: 10.1126/science.aal3327.
- 449 39. Lovell J, Sreedasyam A, Schranz E, Wilson M, Carlson J, Harkess A, et al.. GENESPACE:  
450 syntenic pan-genome annotations for eukaryote.
- 451 40. Manni M, Berkeley MR, Seppey M, Simão FA, Zdobnov EM. BUSCO Update: Novel and  
452 Streamlined Workflows along with Broader and Deeper Phylogenetic Coverage for Scoring of  
453 Eukaryotic, Prokaryotic, and Viral Genomes. *Molecular Biology and Evolution*. 2021; doi:  
454 10.1093/molbev/msab199.
- 455 41. Rhie A, Walenz BP, Koren S, Phillippy AM. Merqury: reference-free quality, completeness,  
456 and phasing assessment for genome assemblies. *Genome Biology*. 2020; doi: 10.1186/s13059-  
457 020-02134-9.
- 458 42. Honaas L, Kahn E. A practical examination of RNA isolation methods for European pear  
459 (*Pyrus communis*). *BMC Research Notes*. 2017; doi: 10.1186/s13104-017-2564-2.
- 460 43. Ou S, Su W, Liao Y, Chougule K, Agda JRA, Hellinga AJ, et al.. Benchmarking  
461 transposable element annotation methods for creation of a streamlined, comprehensive pipeline.  
462 *Genome Biology*. 2019; doi: 10.1186/s13059-019-1905-y.
- 463 44. Pratas MI, Aguiar B, Vieira J, Nunes V, Teixeira V, Fonseca NA, et al.. Inferences on  
464 specificity recognition at the *Malus×domestica* gametophytic self-incompatibility system. *Sci*  
465 *Rep*. 2018; doi: 10.1038/s41598-018-19820-1.
- 466 45. Galimba KD, Bullock DG, Dardick C, Liu Z, Callahan AM. Gibberellic acid induced  
467 parthenocarpic ‘Honeycrisp’ apples (*Malus domestica*) exhibit reduced ovary width and lower  
468 acidity. *Hortic Res*. Nature Publishing Group; 2019; doi: 10.1038/s41438-019-0124-8.
- 469 46. Chang H-Y, Tong CBS. Identification of Candidate Genes Involved in Fruit Ripening and  
470 Crispness Retention Through Transcriptome Analyses of a ‘Honeycrisp’ Population. *Plants*.  
471 Multidisciplinary Digital Publishing Institute; 2020; doi: 10.3390/plants9101335.
- 472 47. Grabherr MG, Haas BJ, Yassour M, Levin JZ, Thompson DA, Amit I, et al.. Full-length  
473 transcriptome assembly from RNA-Seq data without a reference genome. *Nat Biotechnol*. Nature  
474 Publishing Group; 2011; doi: 10.1038/nbt.1883.
- 475 48. Haas B, Papanicolaou A and others. TransDecoder (find Coding Regions within Transcripts).  
476 474Github; 2015; <https://github.com/TransDecoder/transdecoder.github.io>.
- 477 49. Hoff KJ, Lange S, Lomsadze A, Borodovsky M, Stanke M. BRAKER1: Unsupervised RNA-  
478 Seq-Based Genome Annotation with GeneMark-ET and AUGUSTUS. *Bioinformatics*. 2016;  
479 doi: 10.1093/bioinformatics/btv661.
- 480 50. Bolger AM, Lohse M, Usadel B. Trimmomatic: a flexible trimmer for Illumina sequence  
481 data. *Bioinformatics*. 2014; doi: 10.1093/bioinformatics/btu170.

- 482 51. Dobin A, Davis CA, Schlesinger F, Drenkow J, Zaleski C, Jha S, et al.. STAR: ultrafast  
483 universal RNA-seq aligner. *Bioinformatics*. 2013; doi: 10.1093/bioinformatics/bts635.
- 484 52. Li H, Handsaker B, Wysoker A, Fennell T, Ruan J, Homer N, et al.. The Sequence  
485 Alignment/Map format and SAMtools. *Bioinformatics*. 2009; doi:  
486 10.1093/bioinformatics/btp352.
- 487 53. Chen X, Li S, Zhang D, Han M, Jin X, Zhao C, et al.. Sequencing of a Wild Apple (*Malus*  
488 *baccata*) Genome Unravels the Differences Between Cultivated and Wild Apple Species  
489 Regarding Disease Resistance and Cold Tolerance. *G3 (Bethesda)*. 2019; doi:  
490 10.1534/g3.119.400245.
- 491 54. Linsmith G, Rombauts S, Montanari S, Deng CH, Celton J-M, Guérif P, et al.. Pseudo-  
492 chromosome-length genome assembly of a double haploid “Bartlett” pear (*Pyrus communis* L.).  
493 *GigaScience*. 2019; doi: 10.1093/gigascience/giz138.
- 494 55. Kriventseva EV, Kuznetsov D, Tegenfeldt F, Manni M, Dias R, Simão FA, Zdobnov EM.  
495 OrthoDB v10: sampling the diversity of animal, plant, fungal, protist, bacterial and viral  
496 genomes for evolutionary and functional annotations of orthologs. *Nucleic Acids Research*.  
497 2019; doi: 10.1093/nar/gky1053.  
498
- 499 56. Gabriel L, Hoff KJ, Brûna T, Borodovsky M, Stanke M. TSEBRA: transcript selector for  
500 BRAKER. *BMC Bioinformatics*. 2021; doi: 10.1186/s12859-021-04482-0.
- 501 57. Blum M, Chang H-Y, Chuguransky S, Grego T, Kandasamy S, Mitchell A, et al.. The  
502 InterPro protein families and domains database: 20 years on. *Nucleic Acids Res*. 2021; doi:  
503 10.1093/nar/gkaa977.
- 504 58. Jones P, Binns D, Chang H-Y, Fraser M, Li W, McAnulla C, et al.. InterProScan 5: genome-  
505 scale protein function classification. *Bioinformatics*. 2014; doi: 10.1093/bioinformatics/btu031.
- 506 59. The Gene Ontology Consortium. The Gene Ontology Resource: 20 years and still GOing  
507 strong. *Nucleic Acids Res*. 2019; doi: 10.1093/nar/gky1055.
- 508 60. Ashburner M, Ball CA, Blake JA, Botstein D, Butler H, Cherry JM, et al.. Gene Ontology:  
509 tool for the unification of biology. *Nat Genet*. Nature Publishing Group; 2000; doi:  
510 10.1038/75556.
- 511 61. Emms DM, Kelly S. OrthoFinder: solving fundamental biases in whole genome comparisons  
512 dramatically improves orthogroup inference accuracy. *Genome Biology*. 2015; doi:  
513 10.1186/s13059-015-0721-2.
- 514 62. Camacho C, Coulouris G, Avagyan V, Ma N, Papadopoulos J, Bealer K, et al.. BLAST+:  
515 architecture and applications. *BMC Bioinformatics*. 2009; doi: 10.1186/1471-2105-10-421.
- 516 63. Eddy SR. Accelerated Profile HMM Searches. *PLOS Computational Biology*. Public Library  
517 of Science; 2011; doi: 10.1371/journal.pcbi.1002195.

- 518 64. Kurtz S, Phillippy A, Delcher AL, Smoot M, Shumway M, Antonescu C, et al.. Versatile and  
519 open software for comparing large genomes. *Genome Biology*. 2004; doi: 10.1186/gb-2004-5-2-  
520 r12.
- 521 65. Nattestad M, Schatz MC. Assemblytics: a web analytics tool for the detection of variants  
522 from an assembly. *Bioinformatics*. 2016; doi: 10.1093/bioinformatics/btw369.
- 523 66. Chen C, Chen H, Zhang Y, Thomas HR, Frank MH, He Y, et al.. TBtools: An Integrative  
524 Toolkit Developed for Interactive Analyses of Big Biological Data. *Mol Plant*. 2020; doi:  
525 10.1016/j.molp.2020.06.009.

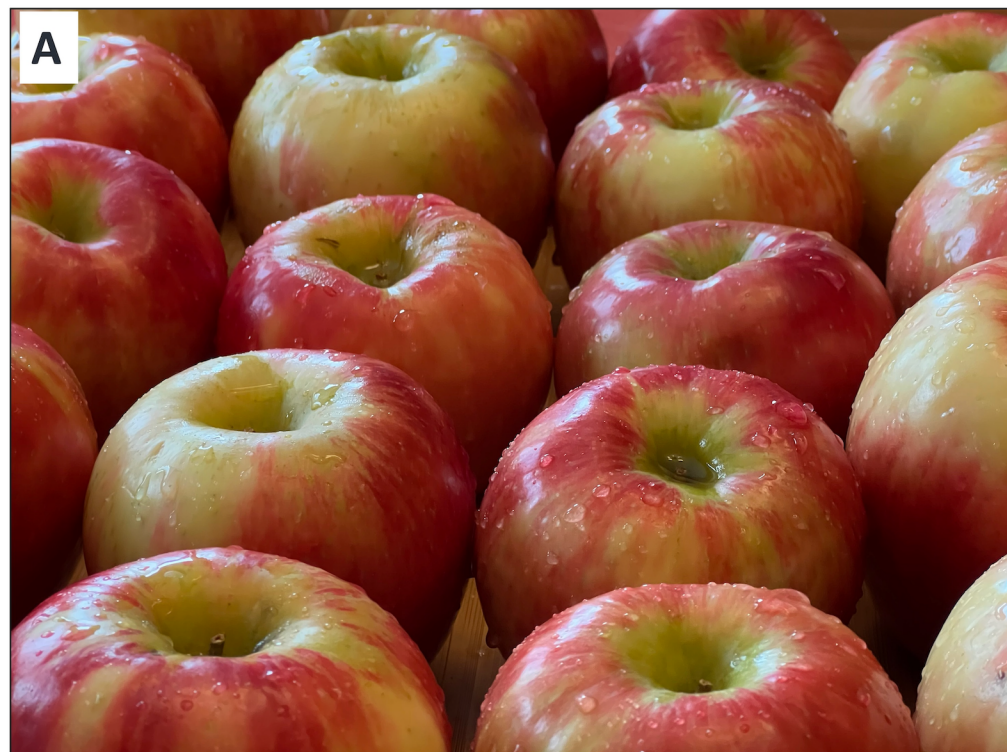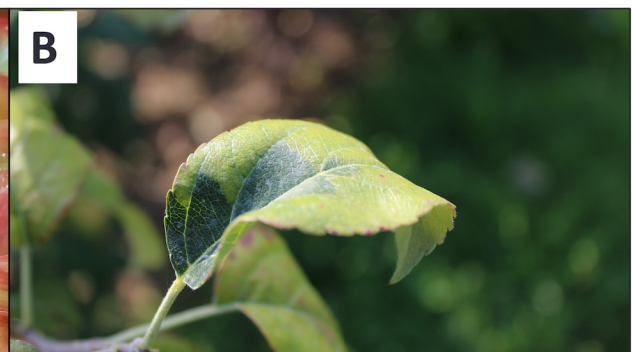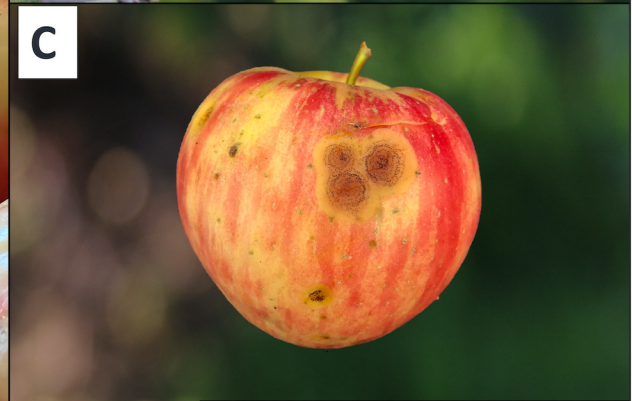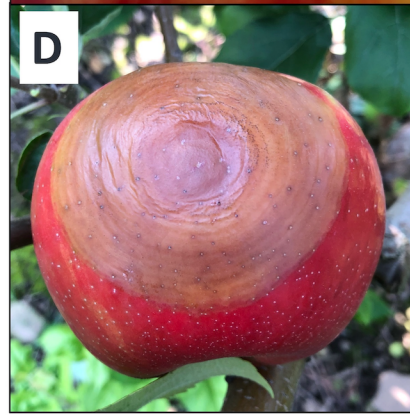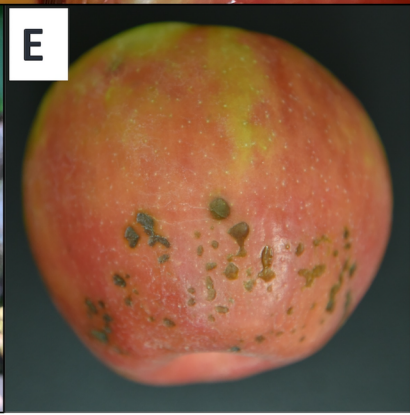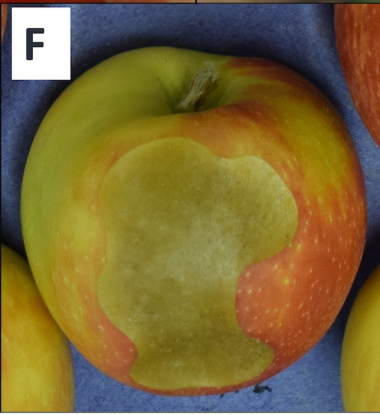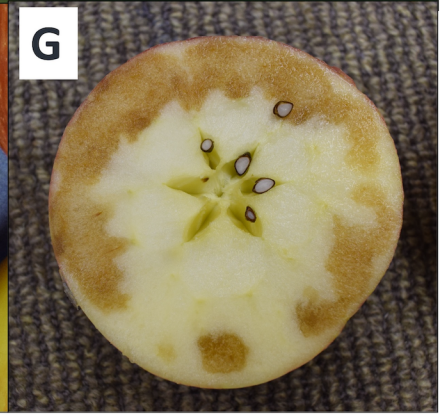



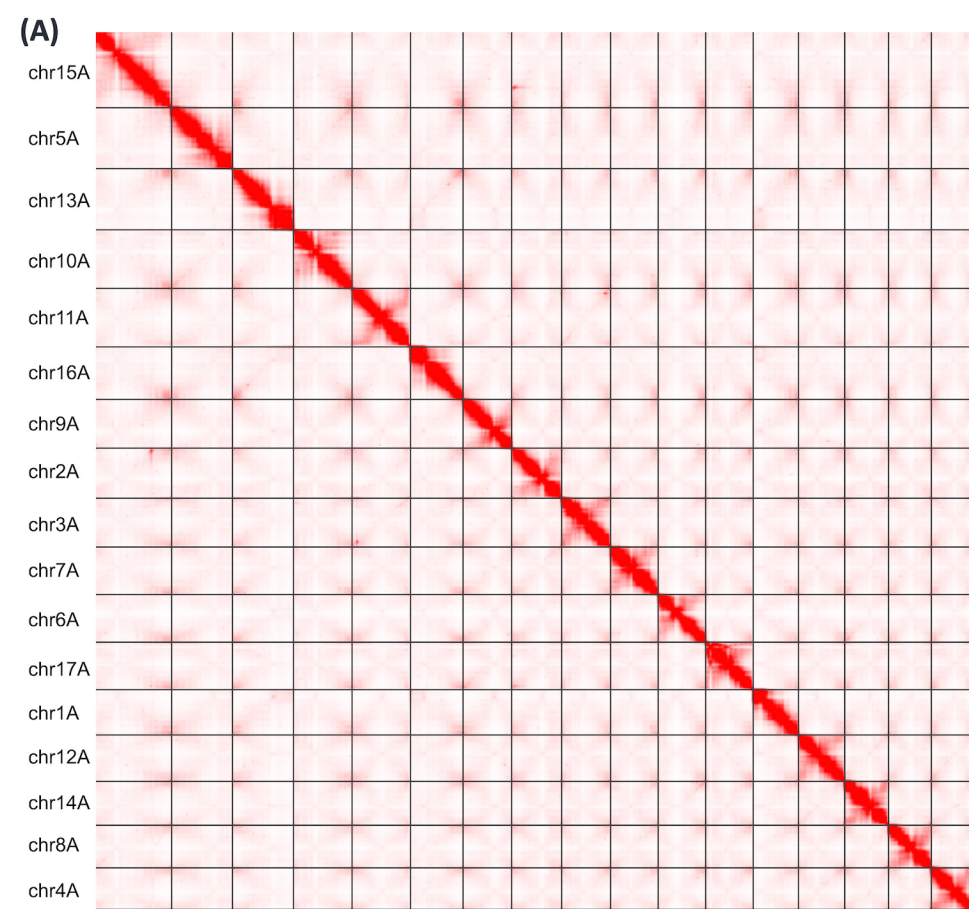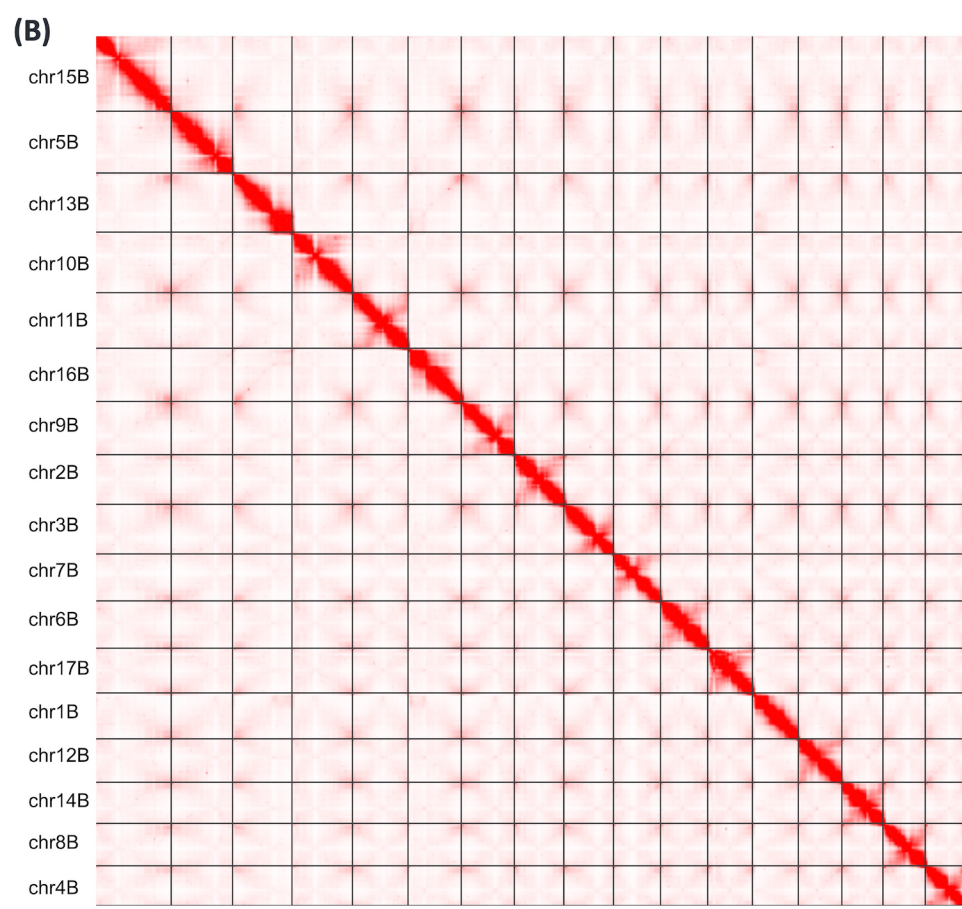

**(A)**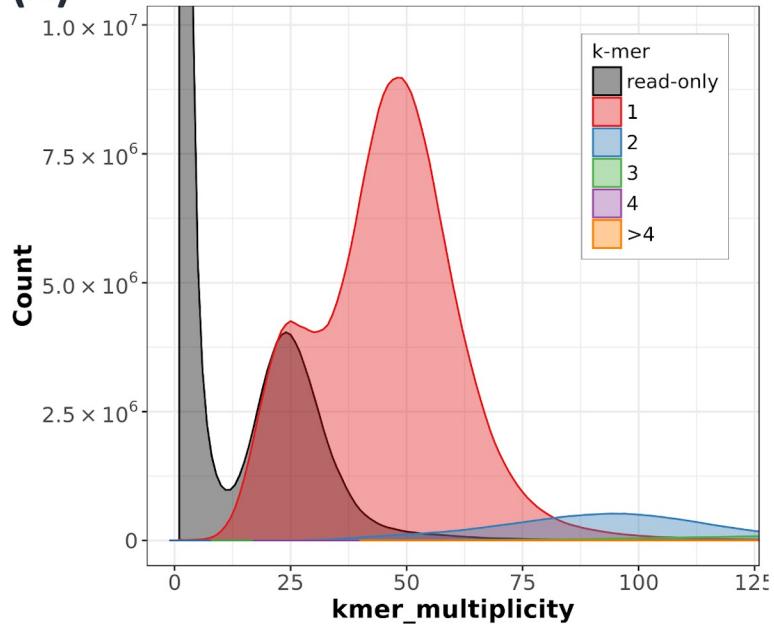**(B)**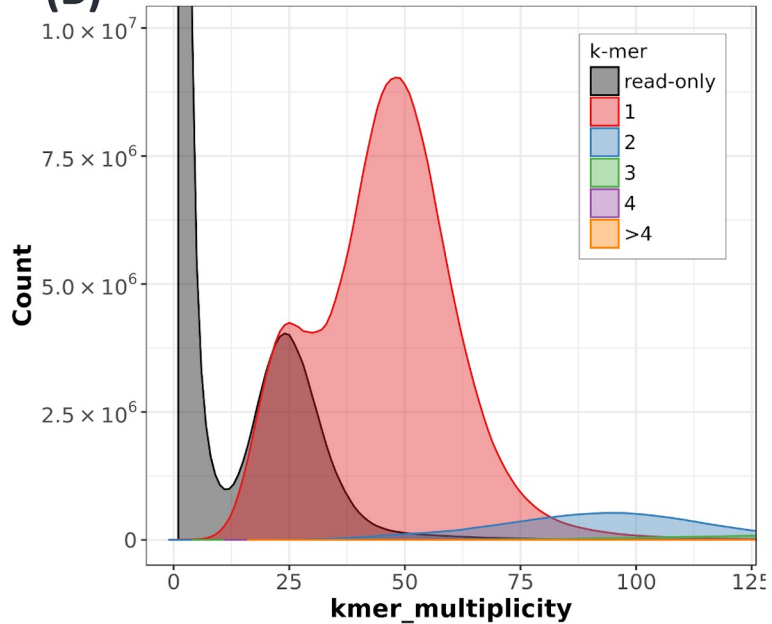

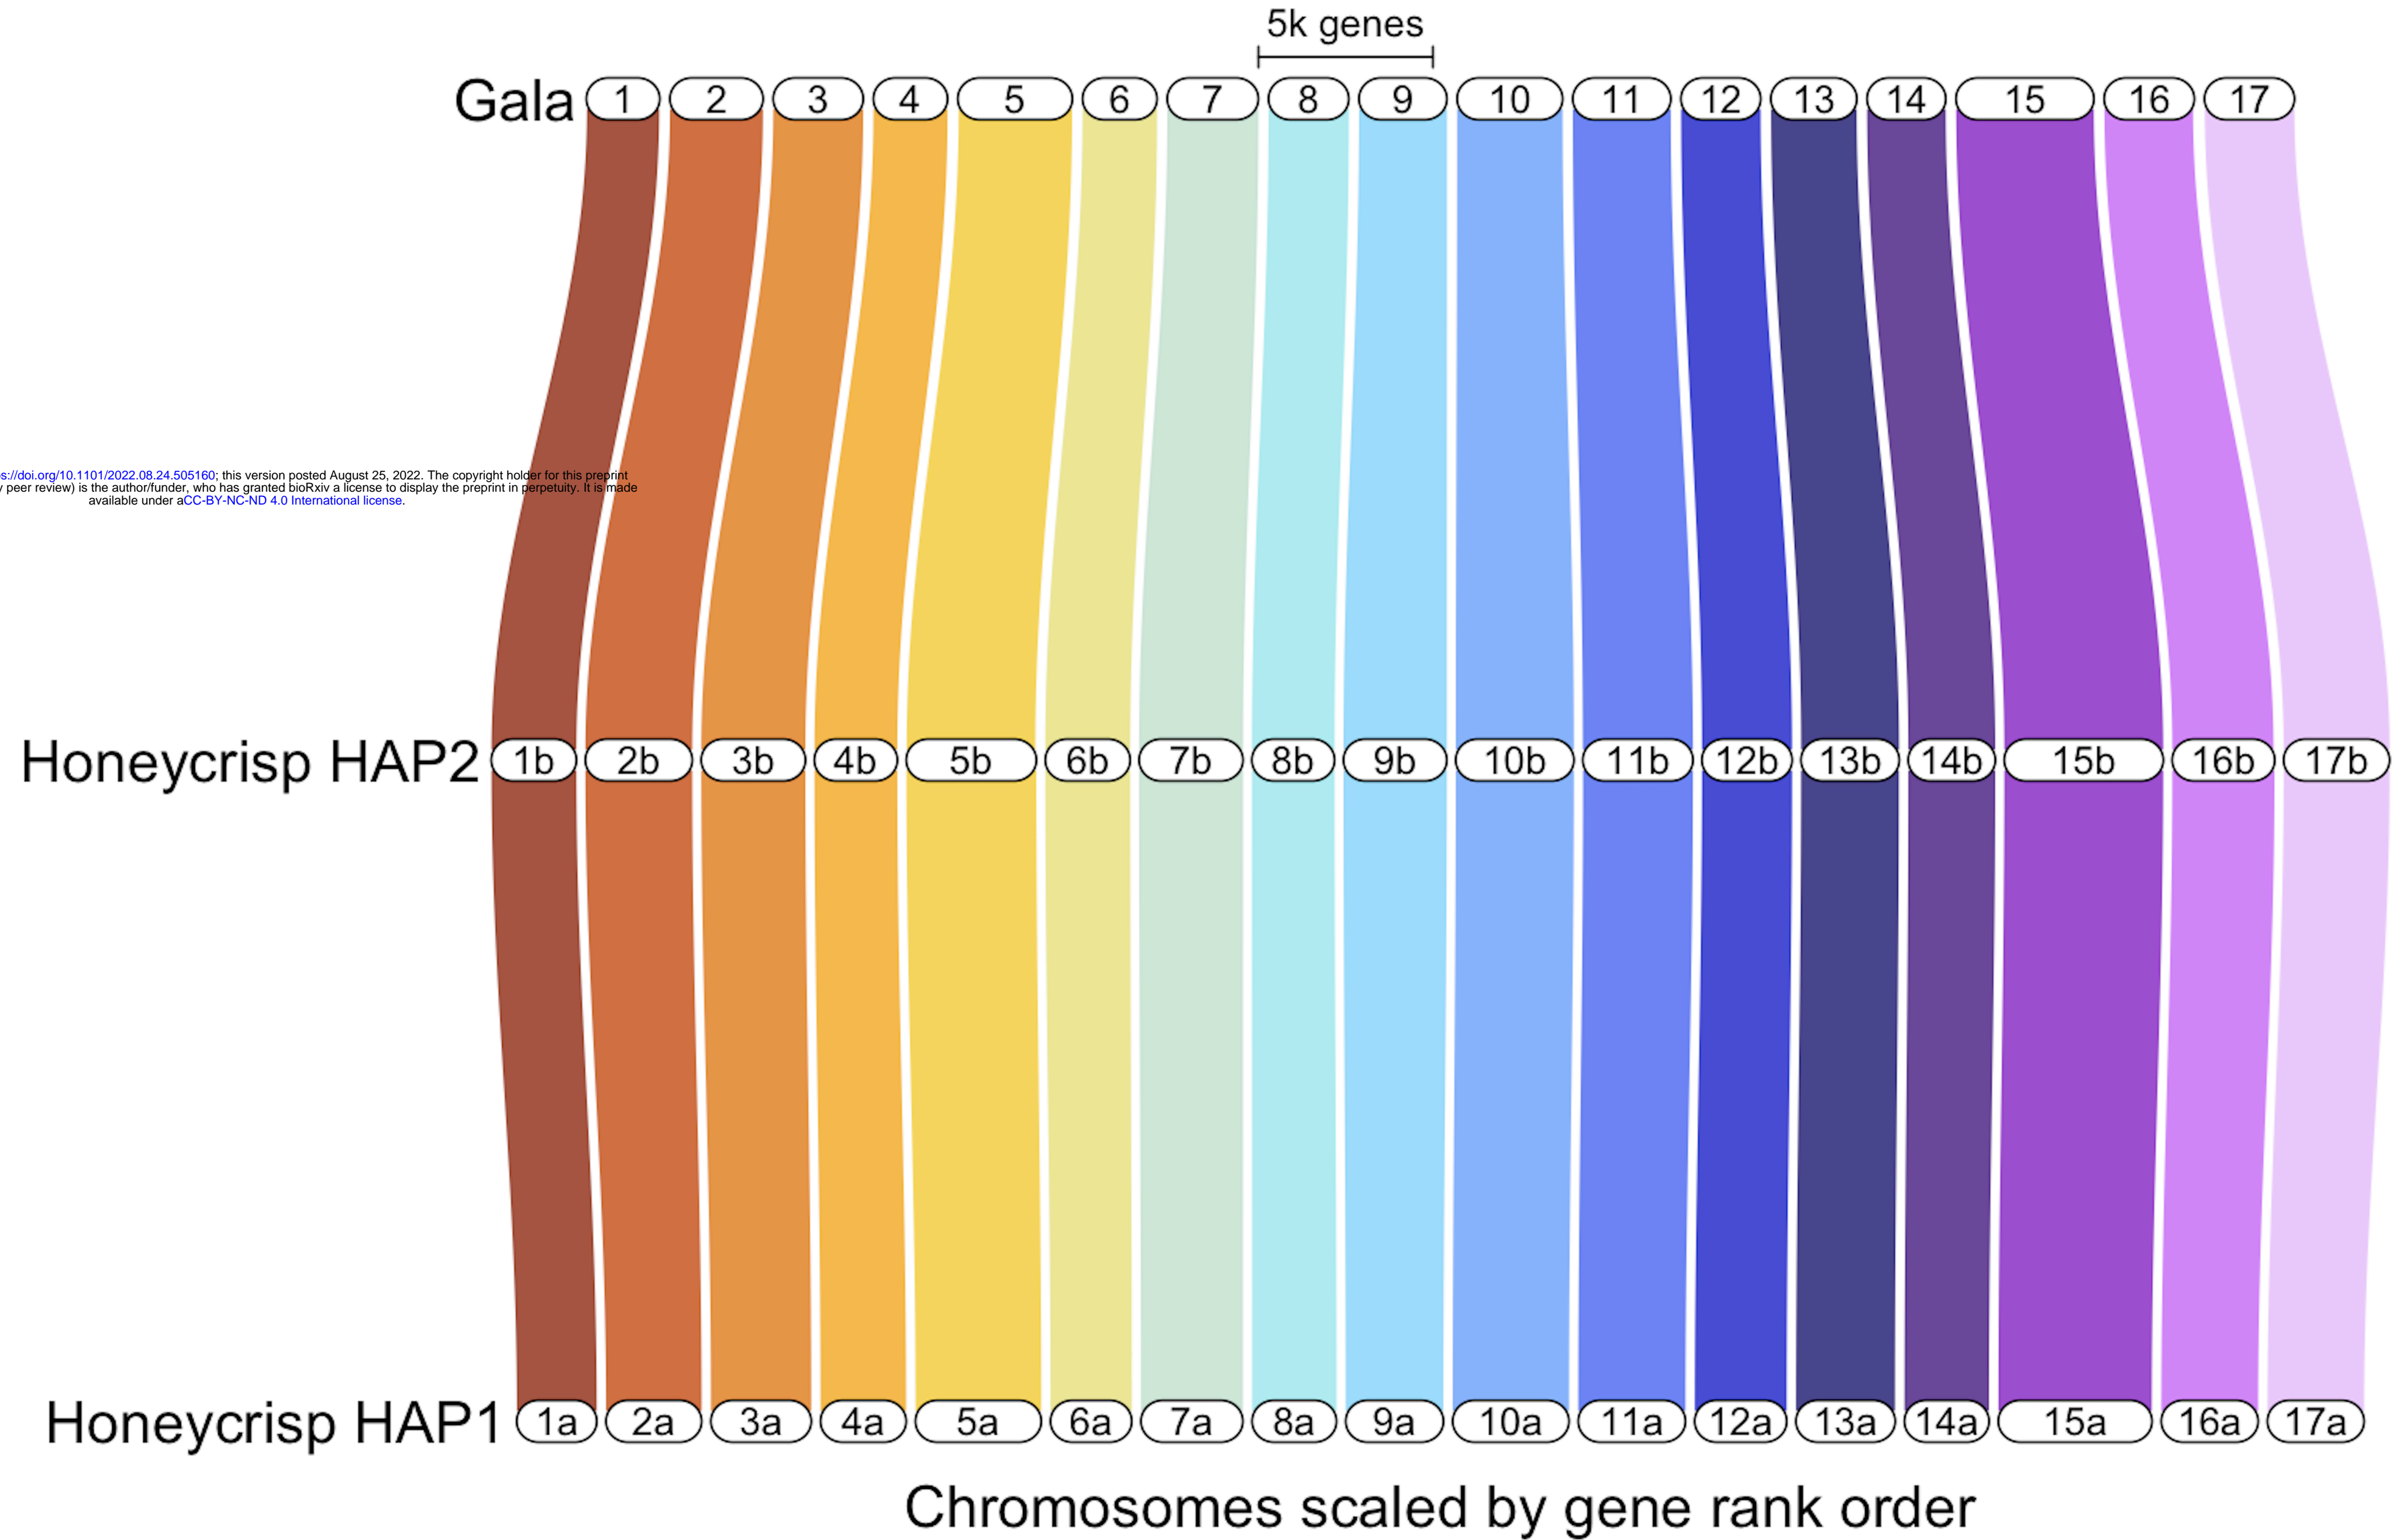

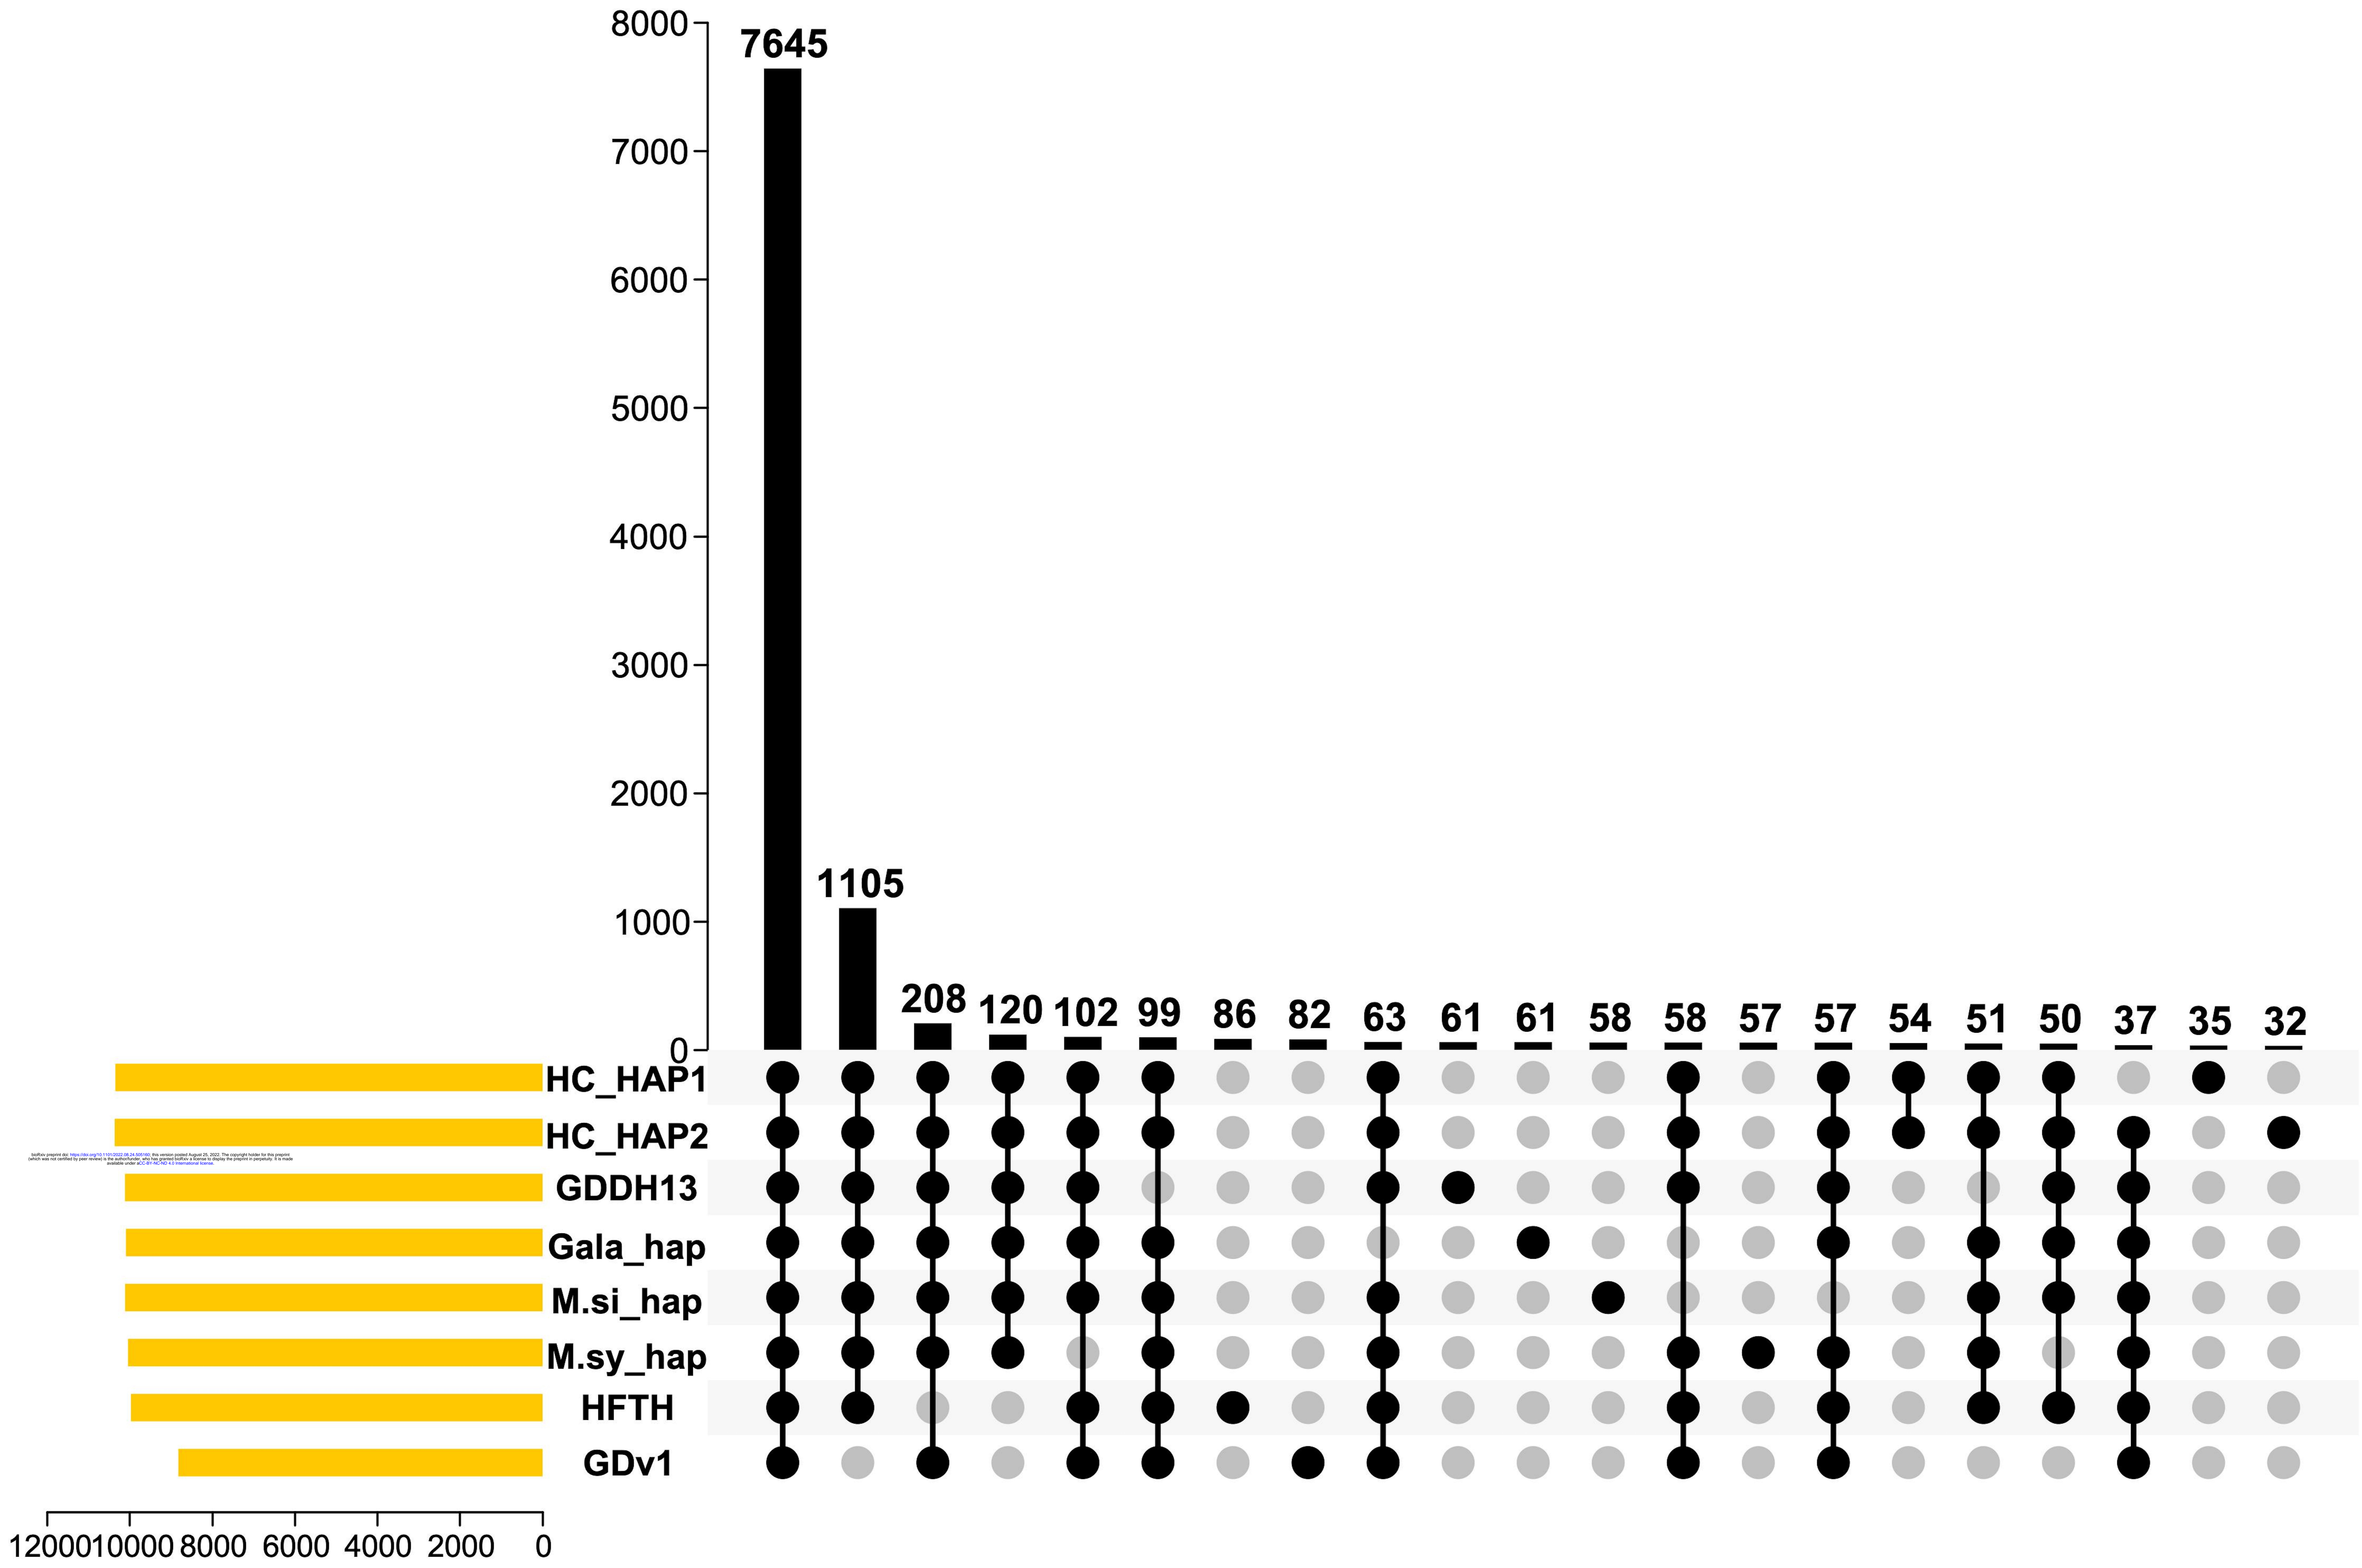

Source: http://biorxiv.org/content/10.1101/2022.08.24.505160v1.full.pdf
